# Supplementary material
Source: publisher figshare collection journal article supplement (https://frontiersin.figshare.com/ndownloader/files/11633444)
Supplement: Supplementary file [file 11633444]

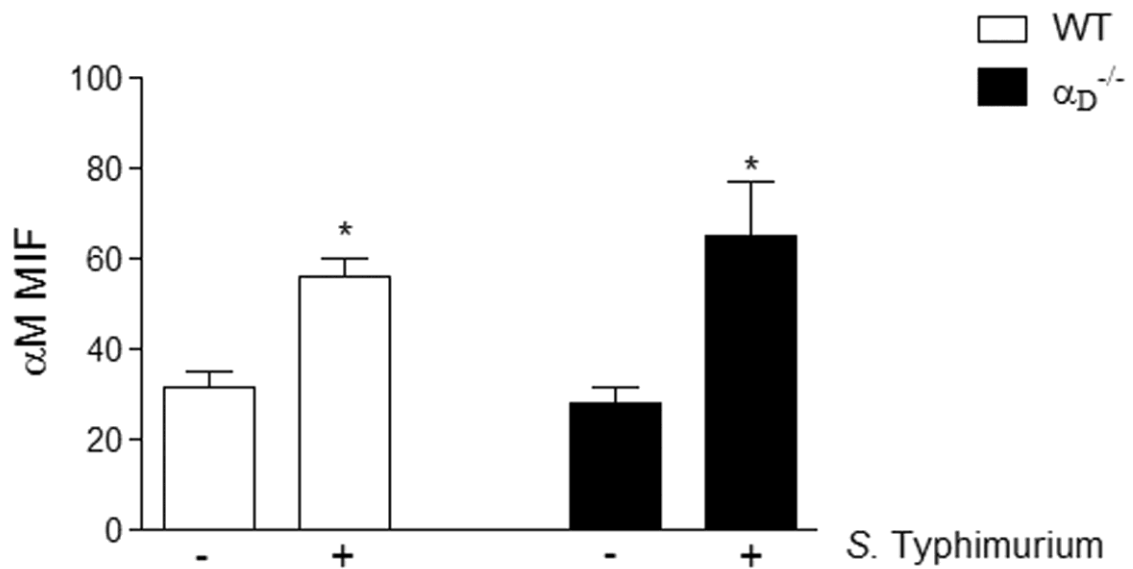

**Supplementar Fig. 2 - Salmonella Typhimurium infection increases  $\alpha_M\beta_2$  expression in peritoneal cells from WT and  $\alpha_D^{-/-}$  mice.** WT and  $\alpha_D^{-/-}$  mice were infected with *S. Typhimurium* ( $10^5$  CFU/animal) by intraperitoneal injection or were sham-infected with sterile, apyrogenic saline as in Figure 1. After 72h of infection, we collected leukocytes by peritoneal lavage for analysis of  $\alpha_M\beta_2$  expression by flow cytometry, as described in “Materials in Methods”. The data were represented by the mean fluorescence intensity (MIF). Each bar indicates the mean  $\pm$  SEM for at least 4 animals. The graphs are representative of two independent experiments. Significant differences (p < 0.005) between infected animals and their controls were indicated by asterisks.
